# Supplementary material for: Dietary cholesterol intake and stroke risk: a meta-analysis
Source: PubMed Central journal article supplement (PMC5986647; doi:10.18632/oncotarget.23933), 2018-01-04
Supplement: oncotarget-09-25698-s001.pdf [file oncotarget-09-25698-s001.pdf]

## Dietary cholesterol intake and stroke risk: a meta-analysis

### SUPPLEMENTARY MATERIALS

**Supplementary Table 1: Newcastle - Ottawa quality assessment scale of the included studies**

| Study         | Selection |    |    |    | Comparability | Exposure |       |     | Score |
|---------------|-----------|----|----|----|---------------|----------|-------|-----|-------|
|               | CDA       | RC | SC | DC |               | AE       | SMACC | NRR |       |
| Seino 1997    | 1         | 0  | 1  | 1  | 2             | 1        | 1     | 1   | 8     |
| Iso 2001      | 1         | 0  | 1  | 1  | 2             | 1        | 1     | 1   | 8     |
| He 2003       | 1         | 1  | 1  | 1  | 2             | 1        | 1     | 1   | 9     |
| Iso 2003      | 1         | 1  | 1  | 1  | 2             | 0        | 1     | 1   | 8     |
| Sauvaget 2004 | 1         | 0  | 0  | 1  | 2             | 1        | 1     | 1   | 7     |
| Larsson 2012  | 1         | 1  | 1  | 1  | 2             | 1        | 1     | 1   | 9     |
| Yaemsiri 2012 | 1         | 1  | 1  | 1  | 2             | 0        | 1     | 1   | 8     |

Abbreviations: CDA, case definition adequate; RC, Representativeness of the cases; SC, selection of controls; DC, definition of controls; AE, ascertainment of exposure; SMACC, same method of ascertainment for cases and controls; NRR, non-response rates.
